# Supplementary material for: AST: An Automated Sequence-Sampling Method for Improving the Taxonomic Diversity of Gene Phylogenetic Trees
Source: PLOS journal article supplement (doi:10.1371/journal.pone.0098844), 2014-06-03
Supplement: S3 (10.1371/journal.pone.0098844.s003) [file journal.pone.0098844.s003]

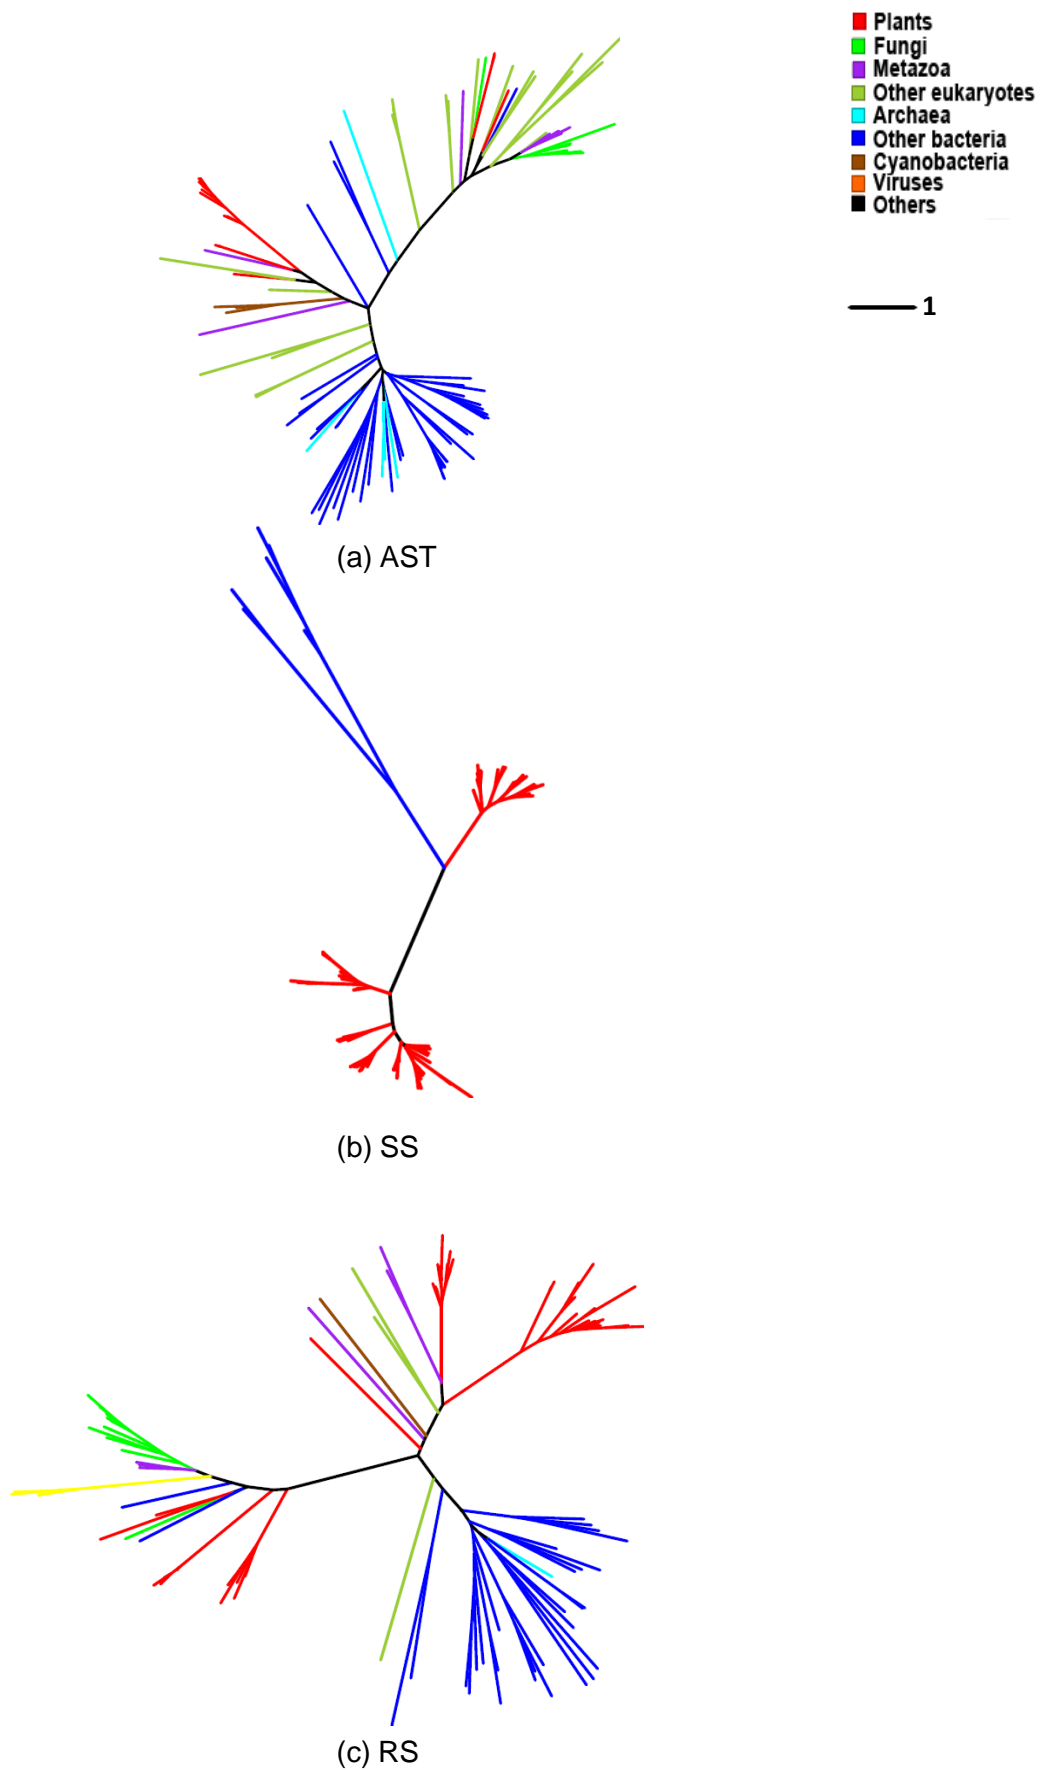

Figure S2: Phylogenetic trees of 100 GT8 sequences sampled by (a) AST, (b) SS and (c) RS, respectively.
