# Supplementary material for: AST: An Automated Sequence-Sampling Method for Improving the Taxonomic Diversity of Gene Phylogenetic Trees
Source: PLoS One. 2014 Jun 3;9(6):e98844. doi: 10.1371/journal.pone.0098844 (PMC4044049; doi:10.1371/journal.pone.0098844)
Supplement: Table S3 — Taxonomic distributions for rpS5 proteins with sequences sampled by AST, SS and RS at the super-phylum, order, family, genus, and species levels. (XLSX) [file pone.0098844.s008.xlsx]

## Sheet: Superphylum
m	# superphyla(AST)	# superphyla(SS)	# superphyla(RS)
50	3	0	1
100	3	0	2
150	3	0	1
200	3	0	2
250	3	0	1
300	3	0	3
350	3	0	3
400	3	1	1

## Sheet: Phylum
m	# phyla(AST)	# phyla(SS)	# phyla(RS)
50	19	1	10
100	19	1	15
150	19	1	13
200	19	1	14
250	19	1	17
300	19	3	17
350	19	3	17
400	19	4	17

## Sheet: Class
m	# class-es (AST)	# class-es(SS)	# class-es(RS)
50	25	1	16
100	30	1	21
150	31	1	20
200	33	2	23
250	33	2	26
300	33	5	29
350	33	6	27
400	33	8	28

## Sheet: Order
m	# orders(AST)	# orders(SS)	# orders(RS)
50	33	1	28
100	41	2	34
150	47	7	41
200	53	12	53
250	60	15	54
300	66	22	58
350	69	23	58
400	71	28	60

## Sheet: Family
m	# families	# families	# families
50	35	1	37
100	46	2	50
150	59	12	57
200	73	19	77
250	82	23	81
300	94	34	93
350	103	38	96
400	111	48	97

## Sheet: Genus
m	# genera	# genera	# genera
50	48	6	44
100	73	21	64
150	99	36	87
200	123	53	111
250	141	61	129
300	159	85	153
350	175	95	166
400	193	112	180

## Sheet: Species
m	# species(AST)	# species(SS)	# species(RS)
50	53	9	53
100	91	36	87
150	146	75	139
200	187	114	183
250	224	141	216
300	268	181	256
350	310	211	290
400	343	246	317
